# Supplementary material
Source: Springer Nature journal article supplement (https://www.springermedizin.de/resource/supplementary/12888_2013_1631_MOESM7_ESM.pdf/9480994)
Supplement: MOESM7 [file 9480994]

**Additional file 7: Responsiveness of 15-item OMS-HC: Standardized Response Mean (SRM)**

|                                                                         | n    | 15 item                  | Attitude<br>(6 item)     | Disclosure/ Help-seeking <sup>1</sup><br>(4 item) | Social Distance<br>(5 item) |
|-------------------------------------------------------------------------|------|--------------------------|--------------------------|---------------------------------------------------|-----------------------------|
| Overall (everyone)                                                      | 811  | 0.40 (0.33-0.47)         | 0.32 (0.25-0.39)         | 0.36 (0.29-0.43)                                  | 0.14 (0.07-0.20)            |
| A. Anti-stigma Workshop 1                                               | 155  | 0.38 (0.23-0.53)         | 0.33 (0.18-0.47)         | 0.36 (0.21-0.51)                                  | <b>0.10 (-0.04-0.24)</b>    |
| B. Anti-stigma Workshop 2                                               | 26   | <b>0.30 (-0.19-0.79)</b> | <b>0.36 (-0.12-0.85)</b> | <b>0.06 (-0.44-0.55)</b>                          | <b>0.19 (-0.08-0.47)</b>    |
| C. Anti-stigma Workshop 3                                               | 24   | -                        | 0.37 (0.10-0.65)         | <b>0.37 (-0.09-0.83)</b>                          | -                           |
| D. University HCP Program 1                                             | 96   | 0.39 (0.18-0.60)         | 0.25 (0.05-0.46)         | 0.53 (0.34-0.72)                                  | <b>0.03 (-0.18-0.23)</b>    |
| E. University HCP Program 2                                             | 41   | <b>0.20 (-0.09-0.49)</b> | <b>0.21 (-0.05-0.48)</b> | <b>0.18 (-0.09-0.45)</b>                          | <b>0.01 (-0.24-0.26)</b>    |
| F. University HCP Program 3                                             | 63   | 0.37 (0.15-0.59)         | <b>0.19 (-0.06-0.44)</b> | 0.66 (0.44-0.88)                                  | <b>0.07 (-0.28-0.14)</b>    |
| G. University HCP Program 4                                             | 88   | 0.84 (0.60-1.08)         | 0.91 (0.68-1.15)         | 0.56 (0.32-0.80)                                  | 0.23 (0.02-0.44)            |
| H. Skills, Physician 1                                                  | 16   | 0.83 (0.40-1.26)         | 0.59 (0.11-1.07)         | 0.66 (0.18-1.13)                                  | <b>0.50 (-0.06-1.06)</b>    |
| I. Skills, ER Nurse/Physician                                           | 21   | 0.26 (0.07-0.46)         | <b>0.30 (-0.04-0.65)</b> | <b>0.06 (-0.27-0.39)</b>                          | <b>0.17 (-0.13-0.48)</b>    |
| J. Other, Hospital Orientation                                          | 168  | 0.37 (0.22-0.52)         | 0.27 (0.13-0.42)         | 0.33 (0.18-0.49)                                  | 0.17 (0.01-0.33)            |
| K. Other, Rounds (BPD)                                                  | 113  | 0.23 (0.08-0.38)         | <b>0.06 (-0.11-0.24)</b> | 0.15 (-0.01-0.30)                                 | 0.30 (0.10-0.49)            |
| MD                                                                      | 336  | 0.38 (0.27-0.49)         | 0.26 (0.16-0.37)         | 0.38 (0.27-0.49)                                  | 0.14 (0.03-0.26)            |
| Practicing MD                                                           | 170  | 0.44 (0.29-0.59)         | 0.31 (0.16-0.46)         | 0.38 (0.21-0.54)                                  | 0.24 (0.07-0.40)            |
| Medical student                                                         | 166  | 0.33 (0.17-0.48)         | 0.21 (0.06-0.36)         | 0.41 (0.27-0.55)                                  | <b>0.06 (-0.09-0.22)</b>    |
| Nurse                                                                   | 174  | 0.36 (0.21-0.50)         | 0.32 (0.18-0.46)         | 0.24 (0.09-0.40)                                  | 0.18 (0.04-0.31)            |
| Allied Health                                                           | 24   | 0.62 (0.45-0.78)         | 0.59 (0.42-0.77)         | 0.56 (0.40-0.72)                                  | <b>0.11 (-0.04-0.26)</b>    |
| Social worker                                                           | 39   | <b>0.21 (-0.03-0.45)</b> | <b>0.21 (-0.05-0.47)</b> | <b>0.05 (-0.24-0.34)</b>                          | <b>0.18 (-0.12-0.48)</b>    |
| Male                                                                    | 177  | 0.35 (0.20-0.49)         | 0.29 (0.14-0.44)         | 0.42 (0.28-0.56)                                  | <b>0.0 (-0.16-0.15)</b>     |
| Female                                                                  | 621  | 0.42 (0.34-0.49)         | 0.33 (0.25-0.41)         | 0.35 (0.27-0.43)                                  | 0.18 (0.11-0.26)            |
| 18-29                                                                   | 417  | 0.47 (0.36-0.58)         | 0.42 (0.31-0.52)         | 0.37 (0.25-0.48)                                  | 0.19 (0.08-0.30)            |
| 30-39                                                                   | 170  | 0.31 (0.14-0.47)         | 0.29 (0.10-0.48)         | 0.19 (0.04-0.34)                                  | <b>0.15 (-0.03-0.33)</b>    |
| 40-49                                                                   | 139  | 0.39 (0.19-0.59)         | 0.36 (0.15-0.57)         | 0.28 (0.08-0.47)                                  | <b>0.16 (-0.03-0.35)</b>    |
| 50-59                                                                   | 109  | 0.36 (0.12-0.60)         | 0.25 (0.03-0.48)         | 0.28 (0.04-0.53)                                  | <b>0.22 (-0.01-0.46)</b>    |
| over 60                                                                 | 17   | <b>0.27 (-0.05-0.59)</b> | <b>0.13 (-0.51-0.25)</b> | 0.55 (0.08-1.02)                                  | <b>0.19 (-0.04-0.43)</b>    |
| 18-25                                                                   | 111  | 0.32 (0.13-0.50)         | 0.21 (0.02-0.40)         | 0.52 (0.34-0.70)                                  | <b>-0.07 (-0.26-0.12)</b>   |
| 26-44                                                                   | 64   | 0.49 (0.21-0.76)         | <b>0.26 (-0.03-0.55)</b> | 0.68 (0.44-0.92)                                  | <b>0.08 (-0.17-0.33)</b>    |
| <i>Do you know a close friend or family member with mental illness?</i> |      |                          |                          |                                                   |                             |
| Yes                                                                     | 1126 | 0.36 (0.28-0.44)         | 0.29 (0.21-0.38)         | 0.33 (0.25-0.41)                                  | 0.12 (0.05-0.20)            |
| No                                                                      | 255  | 0.53 (0.36-0.70)         | 0.40 (0.23-0.57)         | 0.47 (0.32-0.63)                                  | 0.24 (0.06-0.42)            |
| <i>Have you ever been treated for a mental illness?</i>                 |      |                          |                          |                                                   |                             |
| Yes                                                                     | 250  | 0.21 (0.07-0.35)         | 0.20 (0.05-0.35)         | 0.21 (0.04-0.37)                                  | <b>0.02 (-0.14-0.17)</b>    |
| No                                                                      | 1056 | 0.37 (0.29-0.45)         | 0.26 (0.18-0.34)         | 0.37 (0.29-0.45)                                  | 0.15 (0.07-0.24)            |
| <i>Have you ever treated a person with a mental illness?</i>            |      |                          |                          |                                                   |                             |
| Yes                                                                     | 385  | 0.29 (0.18-0.39)         | 0.17 (0.06-0.29)         | 0.27 (0.16-0.38)                                  | 0.17 (0.05-0.28)            |
| No                                                                      | 257  | 0.43 (0.29-0.57)         | 0.31 (0.17-0.45)         | 0.45 (0.32-0.58)                                  | <b>0.14 (-0.01-0.29)</b>    |

\*Bolded values did not show significant change after intervention; t-test (null = change score is equal to zero,  $\alpha > 0.05$ )
